# Supplementary material for: Reversible H2splitting between Ru(ii) and a remote carbanion in a zwitterionic compound
Source: Royal Society of Chemistry journal article supplement (doi:10.1039/b919606d), 2009-12-12

## Supporting Information:

### Reversible H<sub>2</sub> Splitting between Ru(II) and a Remote Carbanion in a Zwitterionic Compound

*Elzbieta Stepowska, Huiling Jiang and Datong Song\**

*Davenport Chemical Research Laboratories, Department of Chemistry, University of Toronto*

*80 St. George Street, Toronto, Ontario, Canada, M5S 3H6*

#### 1. Synthetic procedures and spectroscopic data.

**General.** All reactions were handled under argon using standard Schlenk techniques or in a nitrogen-atmosphere glovebox from MBraun. Unless otherwise stated, all chemicals were purchased from commercial sources and used without further purification. Pentane, hexanes, C<sub>6</sub>H<sub>6</sub>, C<sub>6</sub>D<sub>6</sub> and THF were dried over sodium/benzophenone, vacuum transferred and stored over activated 4 Å molecular sieves in the glovebox. 4,5-Diazafluorene (LH),<sup>1</sup> [RuCl<sub>2</sub>(PPh<sub>3</sub>)<sub>3</sub>]<sup>2</sup> and [RuHCl(PPh<sub>3</sub>)<sub>3</sub>]<sup>3</sup> were prepared according to literature procedures. CD<sub>2</sub>Cl<sub>2</sub> and CDCl<sub>3</sub> were purchased from Cambridge Isotope Laboratories, Inc., dried over CaH<sub>2</sub>, and vacuum transferred before use. NMR spectra were recorded on a Varian 400 spectrometer working at 400 MHz for <sup>1</sup>H, 162 MHz for <sup>31</sup>P and 100 MHz for <sup>13</sup>C, or on a Varian 300 spectrometer working at 300 MHz for <sup>1</sup>H and 121 MHz for <sup>31</sup>P. Elemental analyses were performed at our Chemistry Department using PE 2400 C/H/N/S analyzer. Due to the air- and moisture-sensitive nature of **2** and **3**, no satisfactory elemental analysis results were obtained for these compounds.

**Synthesis of *cis,cis*-[RuHCl(LH)(PPh<sub>3</sub>)<sub>2</sub>] (**1**):** 1.200 g (1.3 mmol) of [RuHCl(PPh<sub>3</sub>)<sub>3</sub>] was dissolved in 90 mL of THF and 0.220 g (1.3 mmol) of LH was added as a solid. The solution was stirred overnight in the glovebox. The orange precipitate was collected by filtration, washed several times with THF and dried under vacuum (86 % yield). <sup>1</sup>H NMR (CDCl<sub>3</sub>, 300 MHz) δ 8.16 (d, 1H, LH), 7.97 (d, 1H, LH),

7.74-7.68 (m, 7H, 6H from PPh<sub>3</sub>, 1H from LH), 7.47 (d, 1 H, LH), 7.20-6.99 (m, 13H, 12H from PPh<sub>3</sub>, 1H from LH), 6.85-6.83 (m, 6 H, PPh<sub>3</sub>), 6.79 (dd, 1H, LH), 3.95 (d, 1H, LH, <sup>2</sup>J<sub>H-H</sub> = 15 Hz), 3.74 (d, 1H, LH, <sup>2</sup>J<sub>H-H</sub> = 15 Hz), -16.32 (t, 1H, <sup>2</sup>J<sub>H-P</sub> = 27.8 Hz, Ru-H). <sup>31</sup>P NMR (CDCl<sub>3</sub>, 162 MHz) δ 75.37 (dd, <sup>2</sup>J<sub>P-P</sub> = 35 Hz, <sup>2</sup>J<sub>H-P</sub> = 20 Hz), 65.25 (dd, <sup>2</sup>J<sub>P-P</sub> = 35 Hz, <sup>2</sup>J<sub>H-P</sub> = 20 Hz). Anal. Calcd for RuP<sub>2</sub>N<sub>2</sub>ClC<sub>47</sub>H<sub>39</sub>: C, 67.99; H, 4.73; N, 3.37. Found: C, 67.57; H, 4.62; N, 3.51.

**Synthesis of *cis,trans*-[RuH(L)(N<sub>2</sub>)(PPh<sub>3</sub>)<sub>2</sub>] (2):** 0.443 g (0.53 mmol) of **1** was dissolved in 50 mL of THF and 0.063 g (0.56 mmol) of KO<sup>t</sup>Bu was added as a solid. The solution was stirred overnight under nitrogen. The volume was reduced by vacuum and pentane was added to afford **2** as a purple precipitate (80% yield). Crystals suitable for X-ray crystallographic analysis were obtained from slow diffusion of pentane into a concentrated solution of **2** in THF. <sup>1</sup>H NMR (C<sub>6</sub>D<sub>6</sub>, 400 MHz) δ 7.96 (d, 1H, <sup>3</sup>J<sub>H-H</sub> = 4 Hz, L), 7.76 (d, 1H, <sup>3</sup>J<sub>H-H</sub> = 8 Hz, L), 7.56 (d, 1H, <sup>3</sup>J<sub>H-H</sub> = 8 Hz, L), 7.35 (m, 12 H, PPh<sub>3</sub>), 6.96 (d, 1H, <sup>3</sup>J<sub>H-H</sub> = 4 Hz, L), 6.85 (m, 18 H, PPh<sub>3</sub>), 6.81 (d, 1H, <sup>3</sup>J<sub>H-H</sub> = 4 Hz, L) 6.44 (s, 1 H, CH of the C<sub>5</sub> ring of L), 6.16 (dd, 1H, <sup>3</sup>J<sub>H-H</sub> = 4, 8 Hz, L), -12.23 (t, 1H, <sup>2</sup>J<sub>P-H</sub> = 20 Hz, Ru-H). <sup>31</sup>P NMR (C<sub>6</sub>D<sub>6</sub>, 162 MHz) δ 49.65 ppm. IR(nujol): ν(Ru-N<sub>2</sub>) 2092 (s) cm<sup>-1</sup>. <sup>13</sup>C NMR (C<sub>6</sub>D<sub>6</sub>, 100 MHz) δ 141.1, 140.6, 137.8, 135.1, 134.0 (t, PPh<sub>3</sub>), 133.6 (t, PPh<sub>3</sub>), 129.7, 128.2 (t, L), 127.5, 127.4, 125.3, 124.6, 117.9, 117.6, 82.2 (CH of the C<sub>5</sub> ring of L).

**Synthesis of *cis,cis,trans*-[Ru(H)<sub>2</sub>(LH)(PPh<sub>3</sub>)<sub>2</sub>] (3):** 0.300 g (0.36 mmol) of **1** was dissolved in 25 mL of THF. 0.016 g (0.4 mmol) of NaH (60 wt% dispersion in mineral oil) was added as a solid. The mixture was stirred overnight under nitrogen, filtered through Celite, and concentrated under vacuum. Pentane was added to afford **3** as a purple precipitate (61 % yield). Crystals suitable for X-ray crystallographic analysis were obtained from slow diffusion of hexanes into a concentrated solution of **3** in THF. <sup>1</sup>H NMR (C<sub>6</sub>D<sub>6</sub>, 300 MHz) δ 8.03 (d, 2 H, <sup>3</sup>J<sub>H-H</sub> = 6 Hz, LH), 7.79 (m, 12 H, PPh<sub>3</sub>), 6.97 (m, 18 H, PPh<sub>3</sub>), 6.68 (d, 2 H, <sup>3</sup>J<sub>H-H</sub> = 6 Hz, LH), 6.28 (dd, 2 H, <sup>3</sup>J<sub>H-H</sub> = 3, 6 Hz, LH), 2.97 (s, 2 H, CH<sub>2</sub> of LH) -

15.43 (t, 2 H,  $^2J_{\text{P-H}} = 27$  Hz, Ru-H).  $^{31}\text{P}\{^1\text{H}\}$  NMR ( $\text{C}_6\text{D}_6$ , 121 MHz)  $\delta$  63.21.  $^{13}\text{C}$  NMR ( $\text{C}_6\text{D}_6$ , 100 MHz)  $\delta$  162.0, 151.7, 140.9 (t,  $\text{PPh}_3$ ), 133.9(t,  $\text{PPh}_3$ ), 133.4, 127.6, 127.4 (t, LH), 125.7, 123.2, 35.4 ( $\text{CH}_2$  of LH).

**2. NMR spectra of 3 and partially deuterated 3 resulting from the  $\text{D}_2$  treatment of 2.**

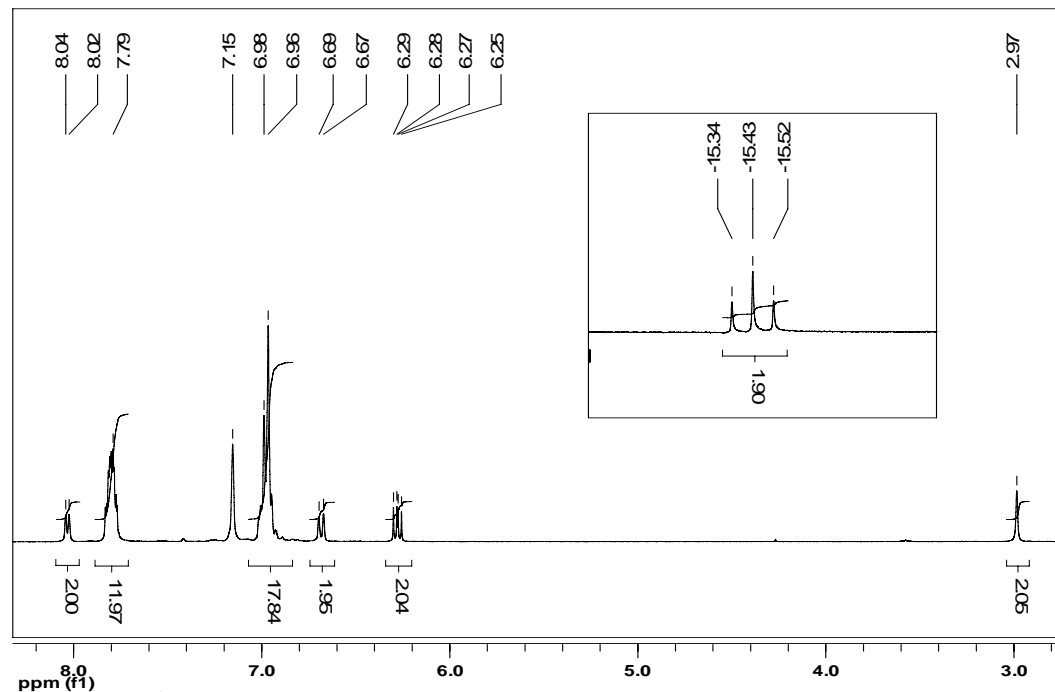

**Figure S1.**  $^1\text{H}$  NMR spectrum of compound 3.

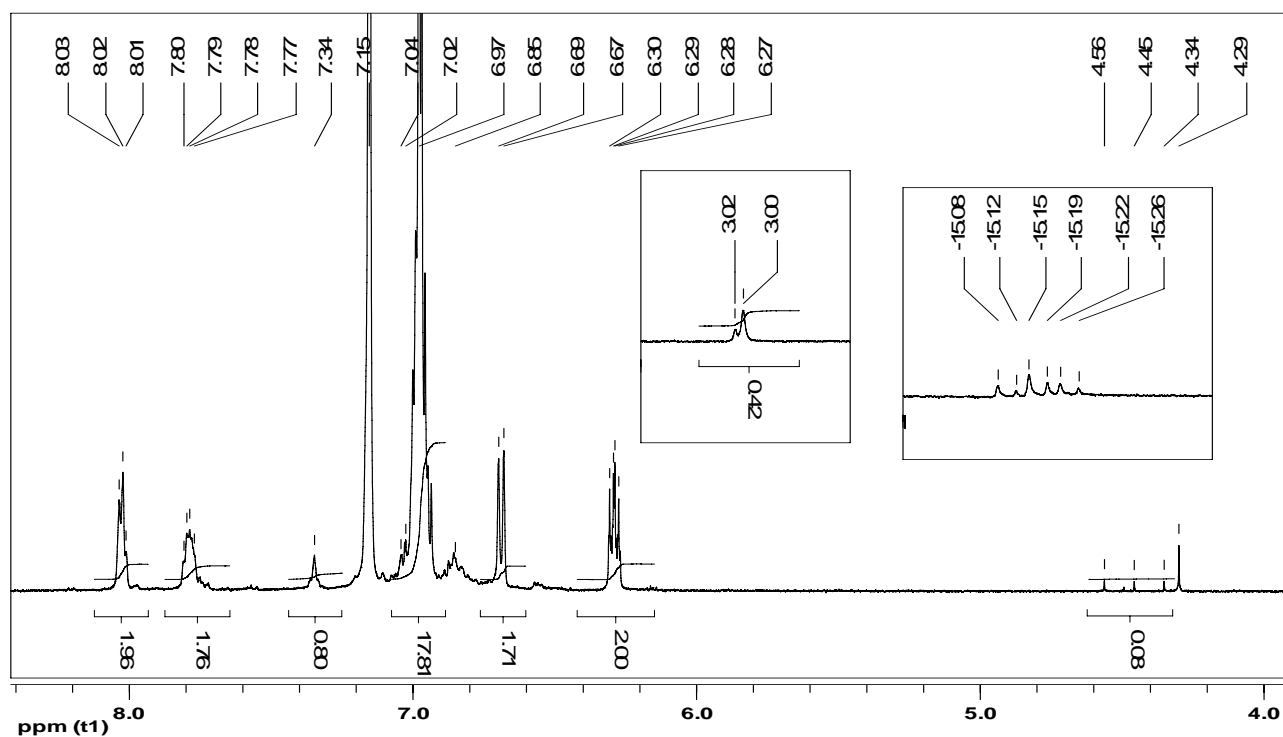

**Figure S2.** Partially deuterated compound **3**, resulting from the reaction of **2** with D<sub>2</sub>.

### 3. Further mechanistic discussions.

If the initial H<sub>2</sub> splitting was Noyori type followed by isomerization, in addition to the observed deuterium incorporation onto the 9-position of the LH ligand, deuterium scrambling onto the pyridine rings should also be possible (see below). However, no deuterium scrambling onto the pyridine rings was observed.

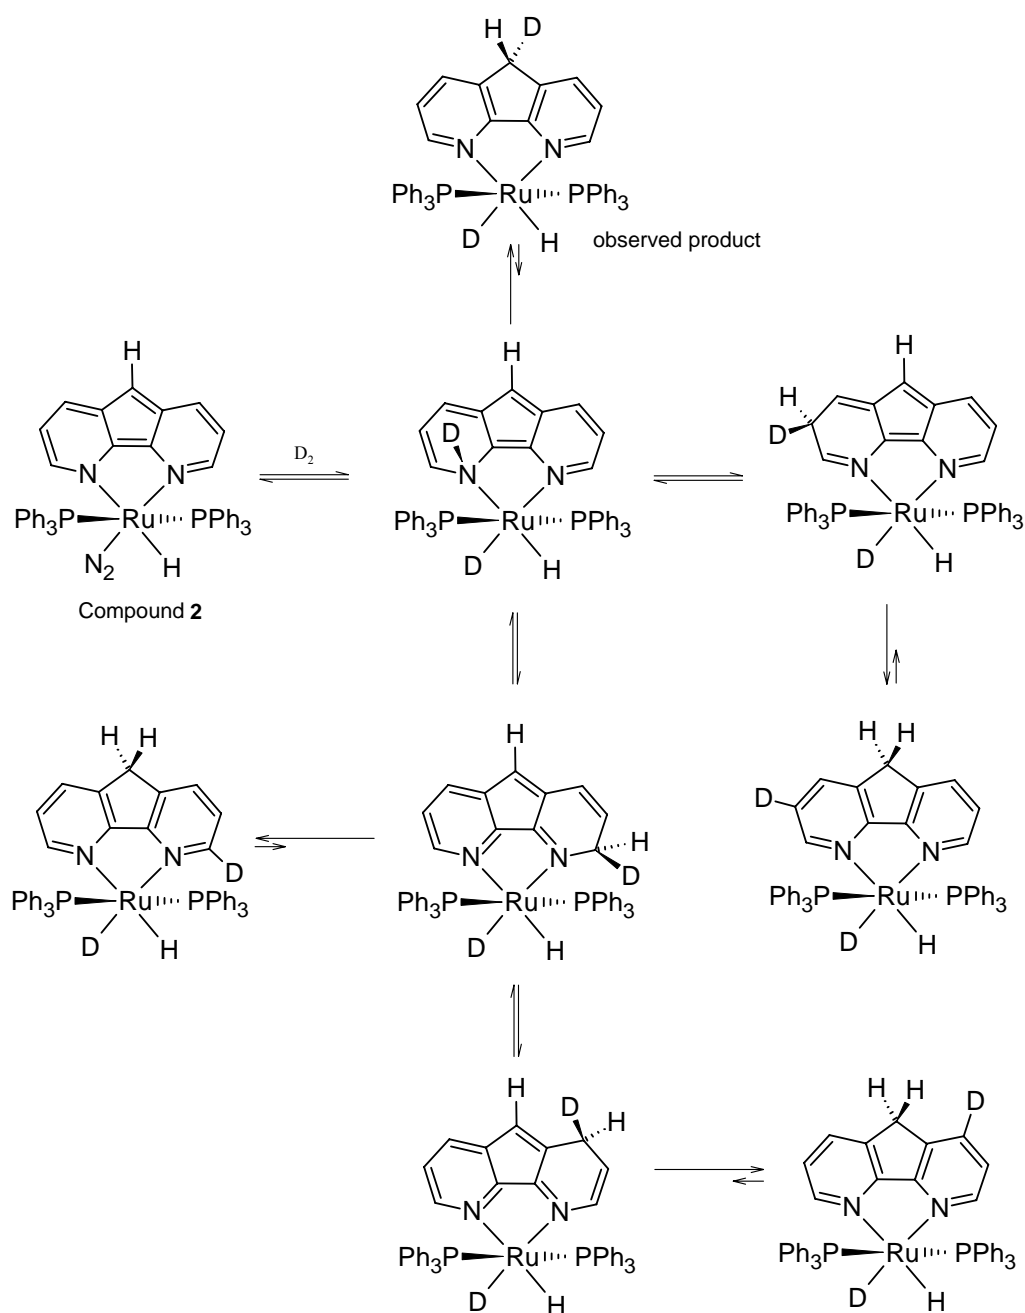

#### 4. X-ray Diffraction Analyses.

Single-crystal X-ray diffraction data for **2** were collected on a Bruker Kappa Apex II diffractometer and those for **3** were collected on a Nonius Kappa CCD diffractometer. In all cases, the collection conditions are as follows: Mo K $\alpha$  radiation ( $\lambda = 0.71073 \text{ \AA}$ ), 50 kV and 30 mA, 150 K controlled by an Oxford Cryostream 700 series low-temperature system. The diffraction data for **3** were processed with the DENZO-SMN software package,<sup>4</sup> while the data for **2** were processed with the Bruker APEX2 software package.<sup>5</sup> All structures were solved by the direct methods and refined using SHELXTL V6.10.<sup>6</sup> All non-hydrogen atoms were refined anisotropically. The positions of the hydrogen atoms were calculated using the riding model.

#### References:

- 1 a) M. J. Plater, S. Kemp, E. Lattmann, *J. Chem. Soc., Perkin Trans. 1*, 2000, **6**, 971-979. b) R. P. Thummel, F. Lefoulon, R. Mahadevan, *J. Org. Chem.* 1985, **50**, 3824.
- 2 S. K. Sharma, V. K. Srivastava, R. V. Jasra, *J. Mol. Catal. A: Chem.* 2006, **245**, 200.
- 3 R. Abbel, K. Abdur-Rashid, M. Faatz, A. Hadzovic, A. J. Lough, R. H. Morris, *J. Am. Chem. Soc.* 2005, **127**, 1870.
- 4 Z. Otwinowski, W. Minor in *Methods in Enzymology, Macromolecular Crystallography, Part A* (Eds.: C. W. Carter, R. M. Sweet) Academic Press: London, 1997; vol. **276**, pp. 307-326.
- 5 Apex 2 Software Package; Bruker AXS Inc. 2008.
- 6 Sheldrick, G. M. *Acta Crystallogr., Sect. A: Found. Crystallogr.* 2008, **64**, 112.

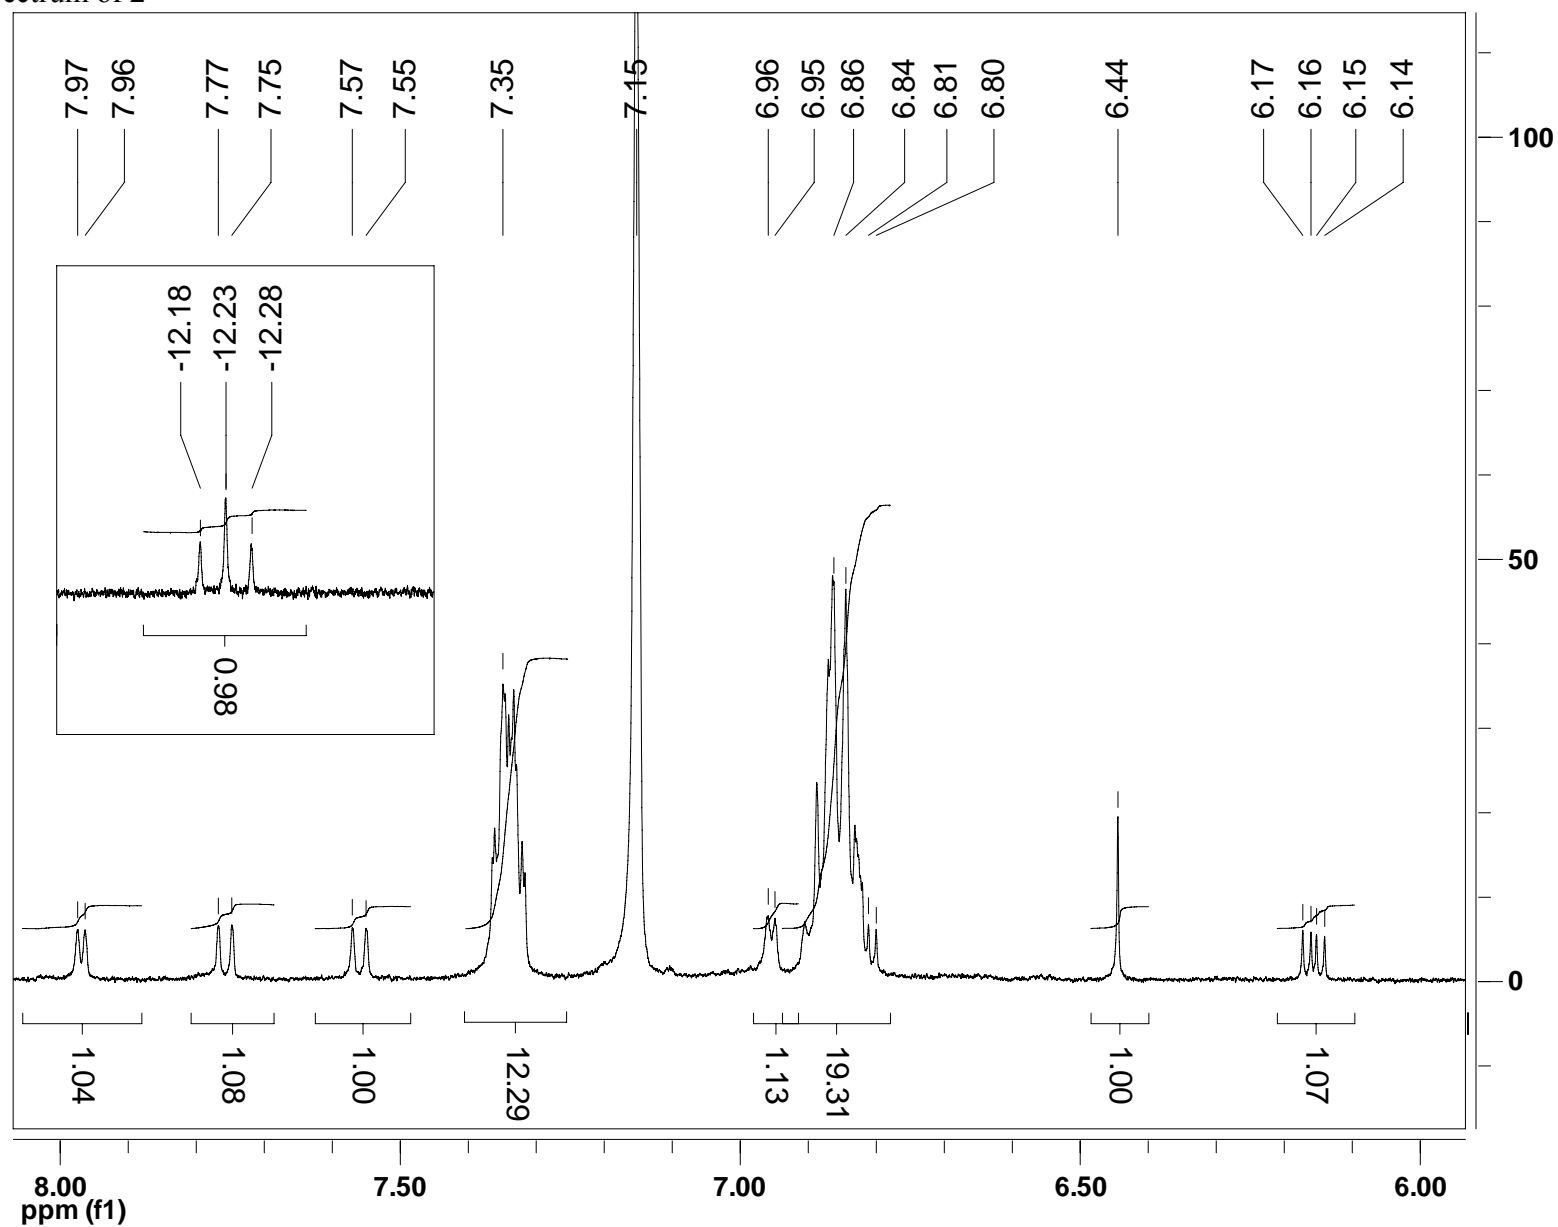

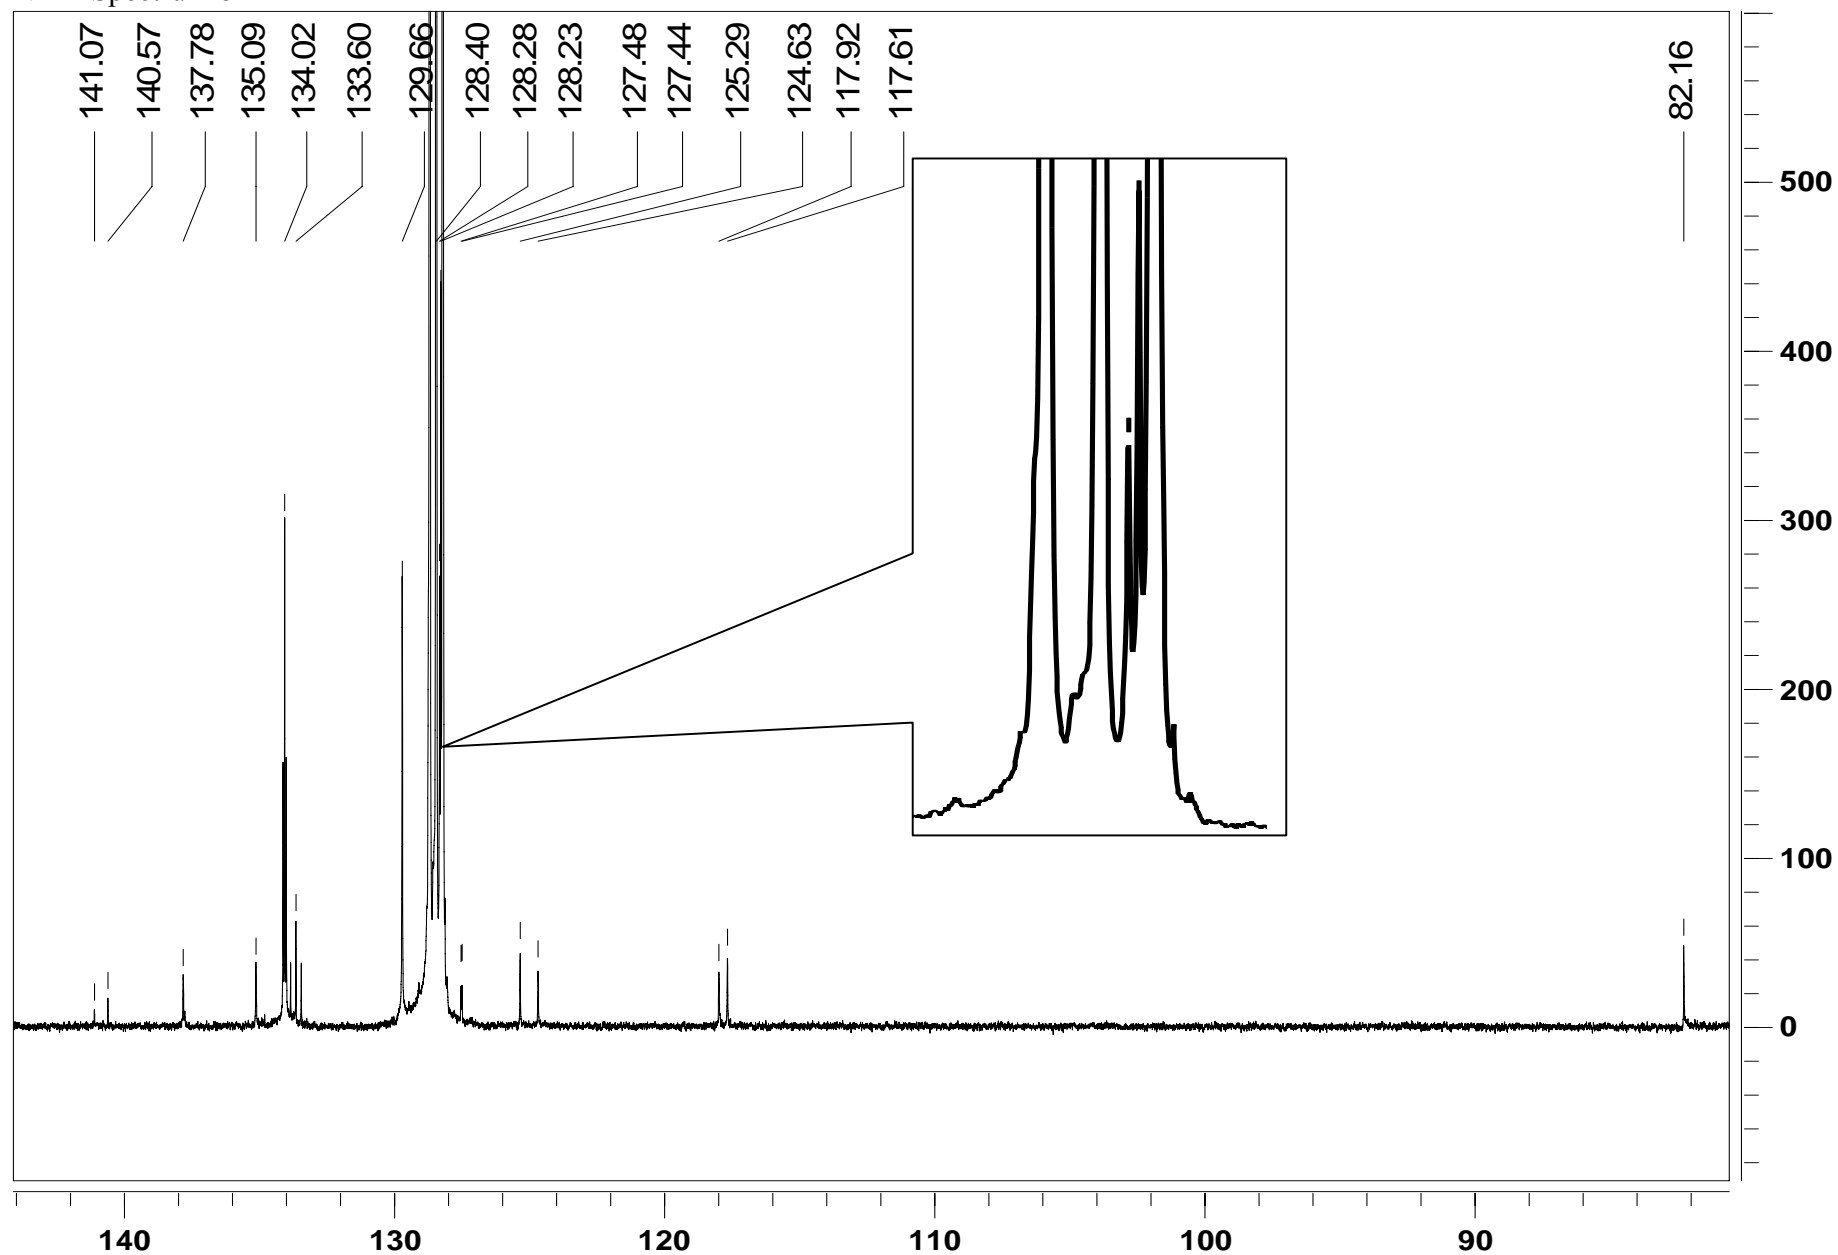



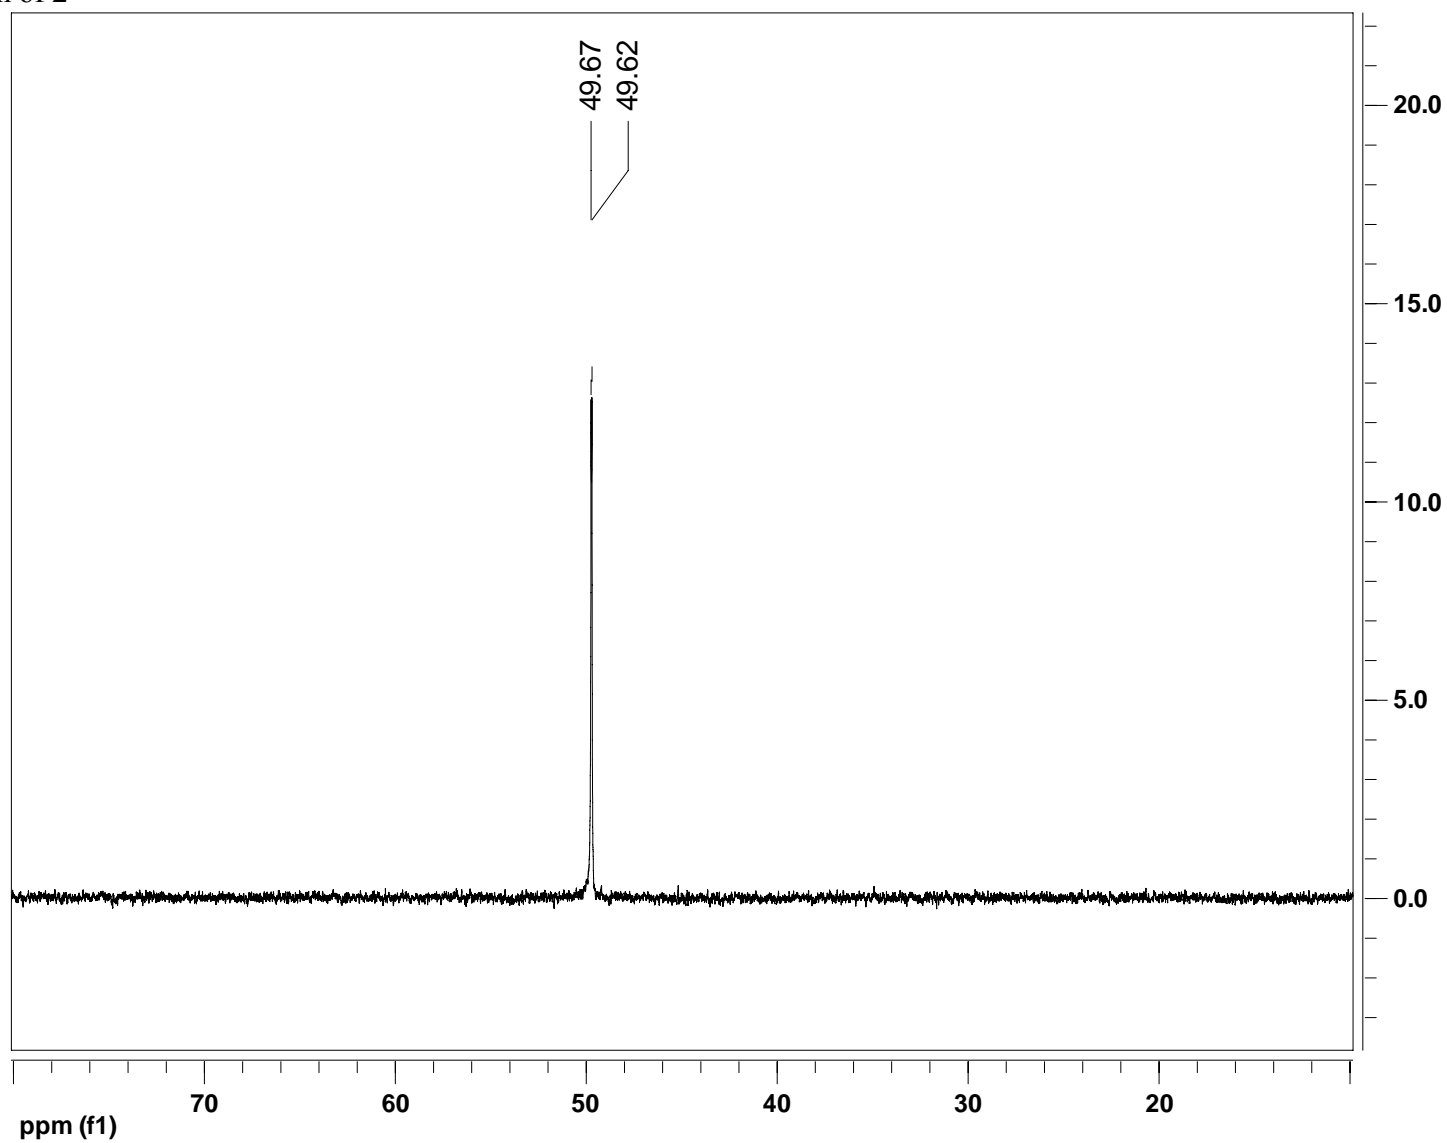

Because of the incomplete decoupling in the hydride region, the <sup>31</sup>P signal has some residual splitting pattern.

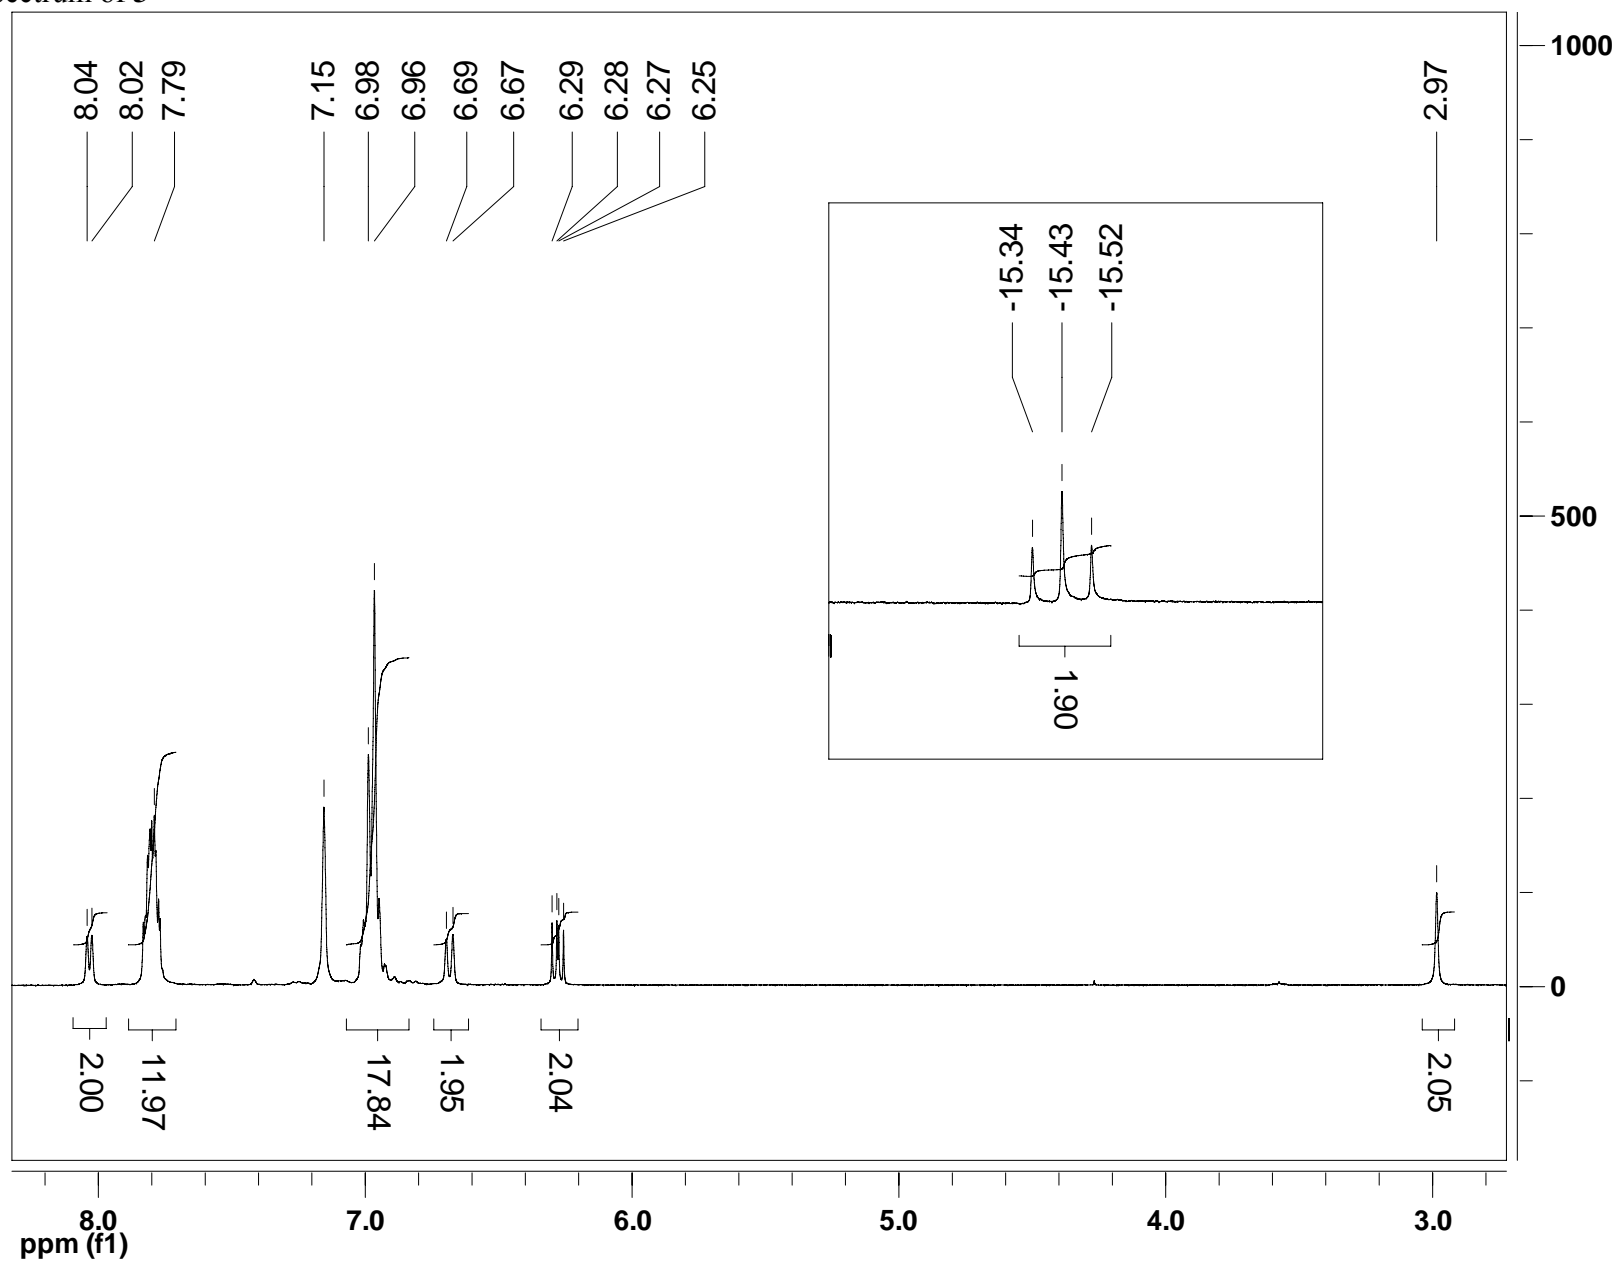

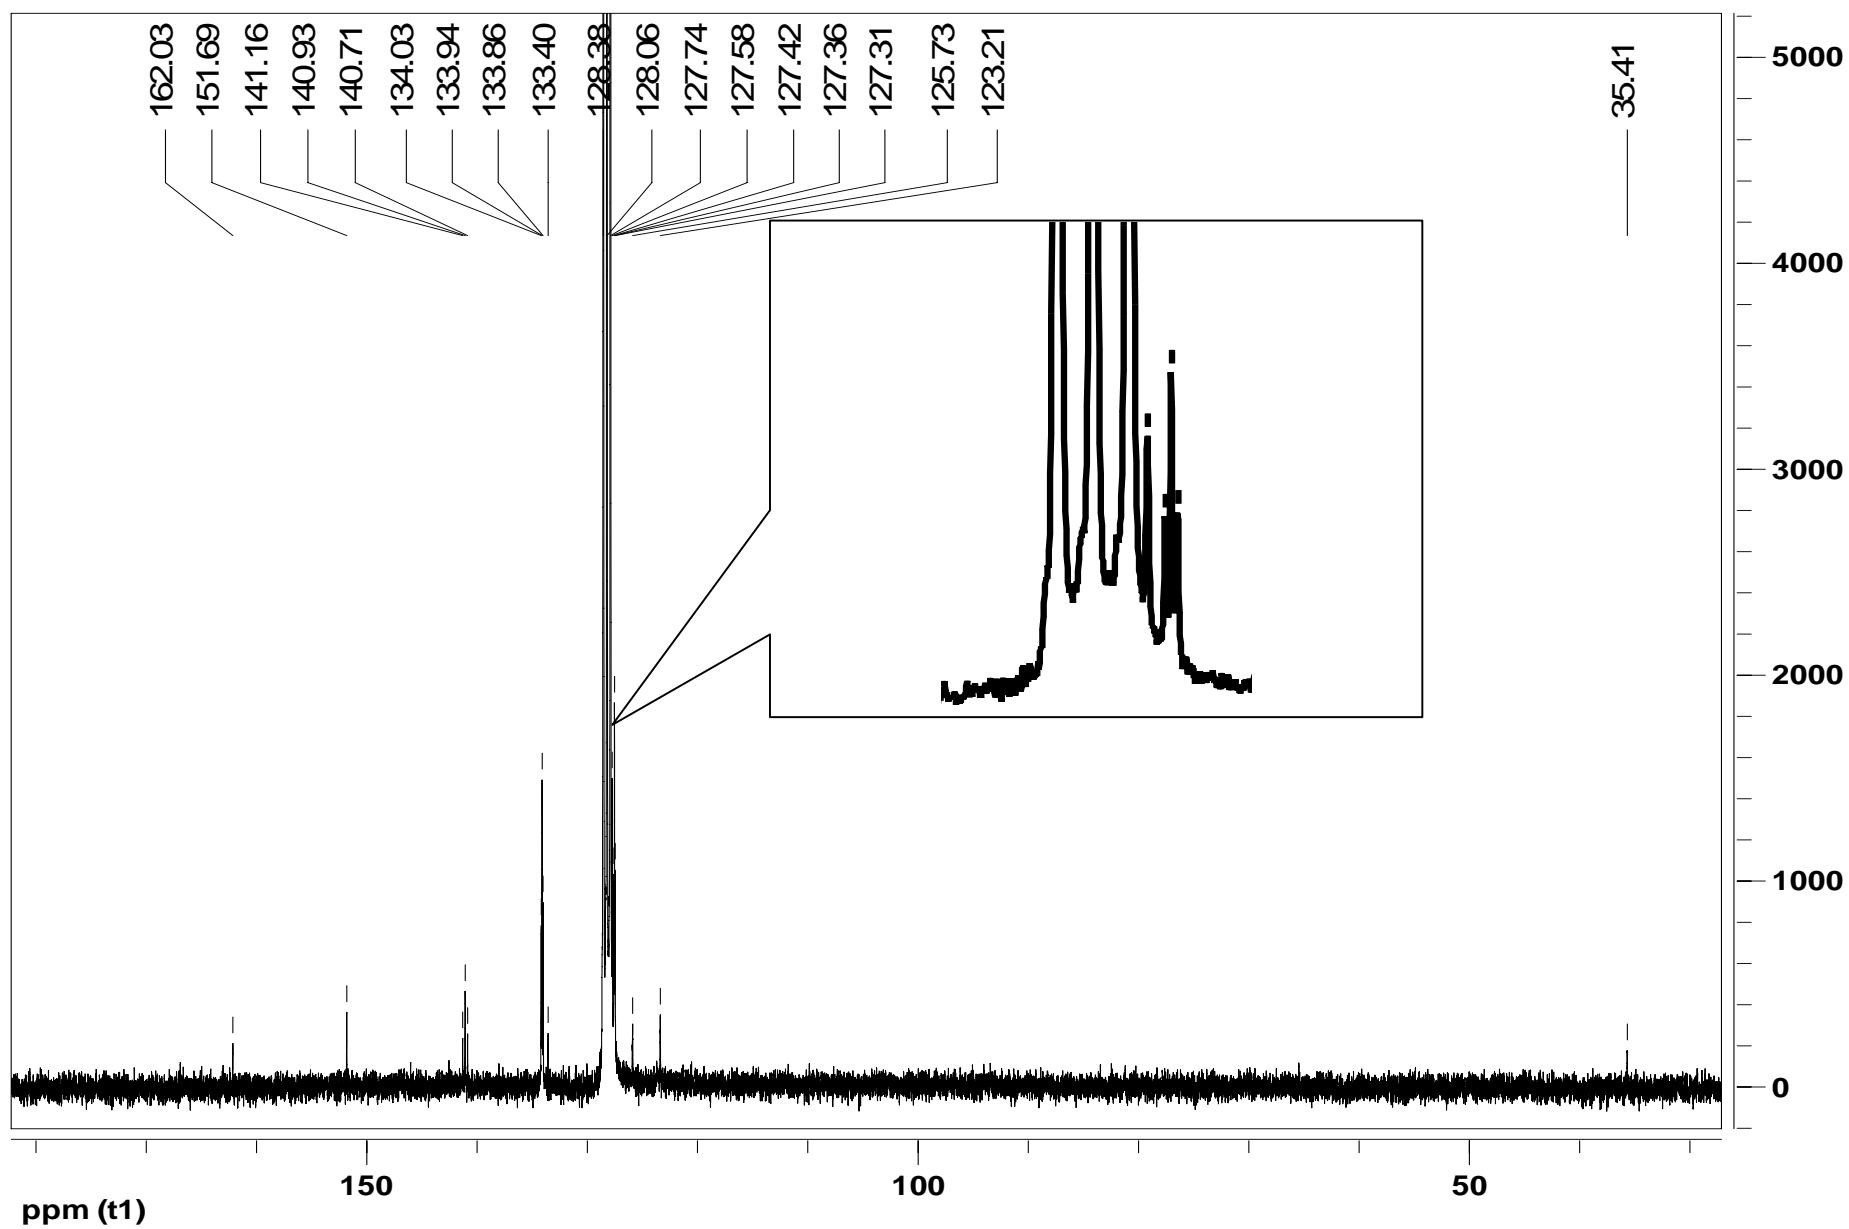

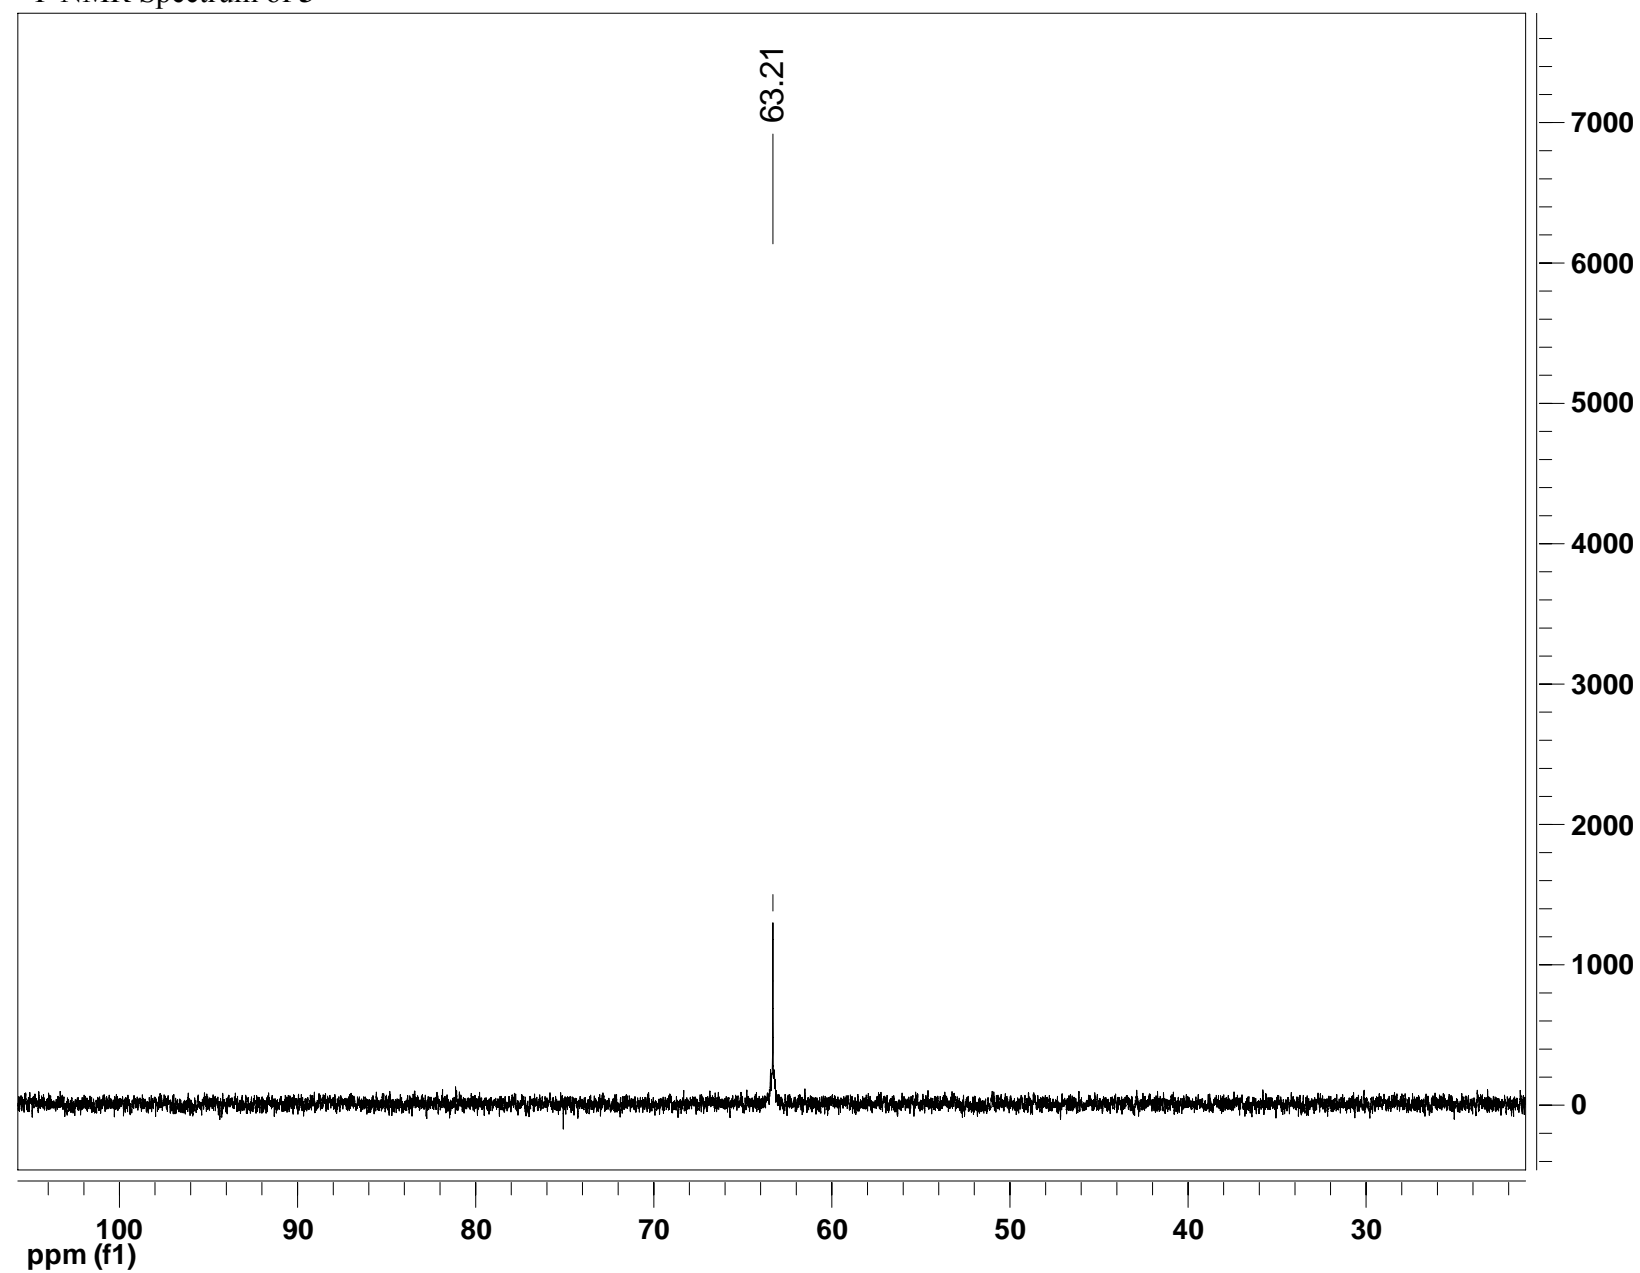

Supplement: b919606d.pdf [file b919606d.pdf]
